# Supplementary material for: Maelstrom Directs Myeloid-Derived Suppressor Cells to Promote Esophageal Squamous Cell Carcinoma Progression via Activation of the Akt1/RelA/IL8 Signaling Pathway
Source: Oxford University Press journal article supplement (doi:10.1158/2326-6066.cir-17-0415), 2018-08-06
Supplement: 23266066cir170415-sup-187466_3_supp_4928173_pcp5qh.doc [file 23266066cir170415-sup-187466_3_supp_4928173_pcp5qh.doc]

**Table S2. The construct and primer sequences of *MAEL* used in the study**.

| ***MAEL*** | **Sequences** |
| --- | --- |
| **Construct sequences** | ATGCCGAACCGTAAGGCCAGCCGGAATGCTTACTATTTCTTCGTGCAGGAGAAGATCCCCGAACTACGGCGACGAGGCCTGCCTGTGGCTCGCGTTGCTGATGCCATCCCTTACTGCTCCTCAGACTGGGCGCTTCTGAGGGAGGAAGAAAAGGAGAAATACGCAGAAATGGCTCGAGAATGGAGGGCCGCTCAGGGAAAGGACCCTGGGCCCTCAGAGAAGCAGAAACCTGTTTTCACACCACTGAGGAGGCCAGGCATGCTTGTACCAAAGCAGAATGTTTCACCTCCAGATATGTCAGCTTTGTCTTTAAAAGGTGATCAAGCTCTCCTTGGAGGCATTTTTTATTTTTTGAACATTTTTAGCCATGGCGAGCTACCTCCTCATTGTGAACAGCGCTTCCTCCCTTGTGAAATTGGCTGTGTTAAGTATTCTCTCCAAGAAGGTATTATGGCAGATTTCCACAGTTTTATAAATCCTGGTGAAATTCCACGAGGATTTCGATTTCATTGTCAGGCTGCAAGTGATTCTAGTCACAAGATTCCTATTTCAAATTTTGAACGTGGGCATAACCAAGCAACTGTGTTACAAAACCTTTATAGATTTATTCATCCCAACCCAGGGAACTGGCCACCTATCTACTGCAAGTCTGATGATAGAACCAGAGTCAACTGGTGTTTGAAGCATATGGCAAAGGCATCAGAAATCAGGCAAGATCTACAACTTCTCACTGTAGAGGACCTTGTAGTGGGGATCTACCAACAAAAATTTCTCAAGGAGCCCTCTAAGACTTGGATTCGAAGCCTCCTAGATGTGGCCATGTGGGATTATTCTAGCAACACAAGGTGCAAGTGGCATGAAGAAAATGATATTCTCTTCTGTGCTTTAGCTGTTTGCAAGAAGATTGCGTACTGCATCAGTAATTCTCTGGCCACTCTCTTTGGAATCCAGCTCACAGAGGCTCATGTACCACTACAAGATTATGAGGCCAGCAATAGTGTGACACCCAAAATGGTTGTATTGGATGCAGGGCGTTACCAGAAGCTAAGGGTTGGGAGTTCAGGATTCTCTCATTTCAACTCTTCTAATGAGGAACAAAGATCAAACACACCCATTGGTGACTACCCATCTAGGGCAAAAATTTCTGGCCAAAACAGCAGCGTTCGGGGAAGAGGAATTACCCGCTTACTAGAGAGCATTTCCAATTCTTCCAGCAATATCCACAAATTCTCCAACTGTGACACTTCACTCTCACCTTACATGTCCCAAAAAGATGGATACAAATCTTTCTCTTCCTTATCTTAA |
| **Primer sequences** | Forward: ATTCTAGAATGCCGAACCGTAAGGG Reverse: TTGTCGACTTAAGATAAGGAAGAGAAAGATTTG |
